# Supplementary material
Source: publisher site journal article supplement (https://www.spandidos-publications.com/3441/downloadSupplementary)

Figure S1. Overexpression of slug in A2780 cells rescues the phenotype induced by treatment with nigericin combined with cisplatin. (A) Slug expression was determined by western blotting. Tubulin was used as a control. Overexpression of slug rescued the inhibitory effect of nigericin and cisplatin on (B) migration and (C) colony formation. Scale bar, 50  $\mu$ m. \*P<0.01 vs. vector.

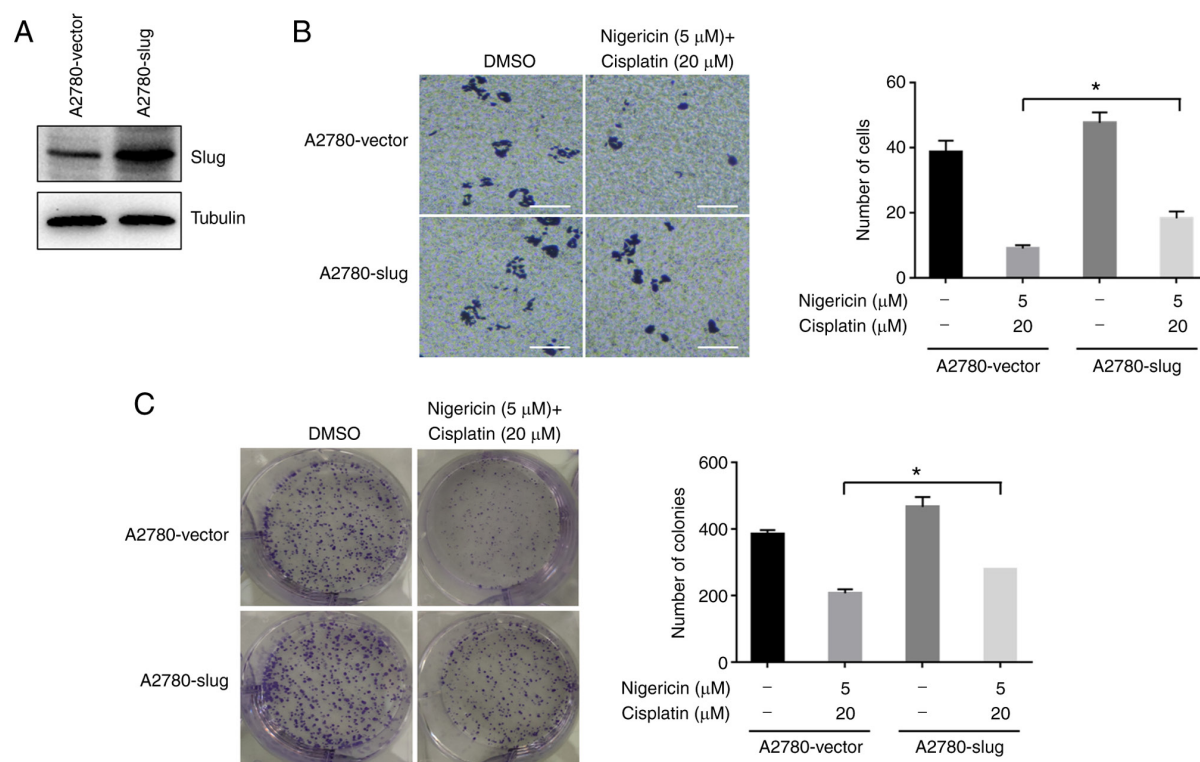

Supplement: Supplementary file 1 [file downloadSupplementary]
